# Supplementary material for: Feather moult and bird appearance are correlated with global warming over the last 200 years
Source: PubMed Central journal article supplement (PMC6557852; doi:10.1038/s41467-019-10452-1), 2019-06-10
Supplement: 41467_2019_10452_MOESM1_ESM.pdf [file 41467_2019_10452_MOESM1_ESM.pdf]

Feather moult and bird appearance are correlated  
with global warming over the last 200 years

Kiat et al.

SUPPLEMENTARY INFORMATION

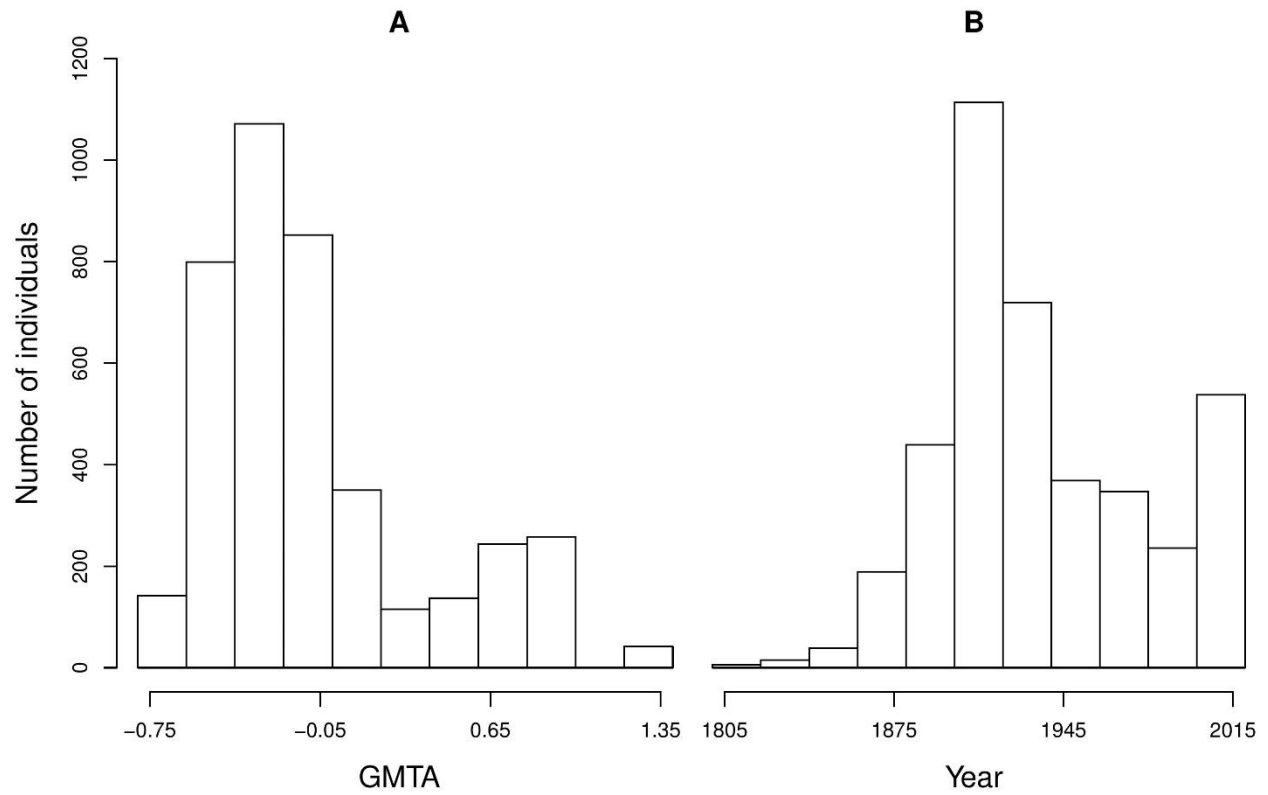

**Supplementary Figure 1.** Histograms of the examined individuals ( $n = 4012$ ) in relation to (A) Global Mean Temperature Anomalies (GMTA), and (B) year.

**A**

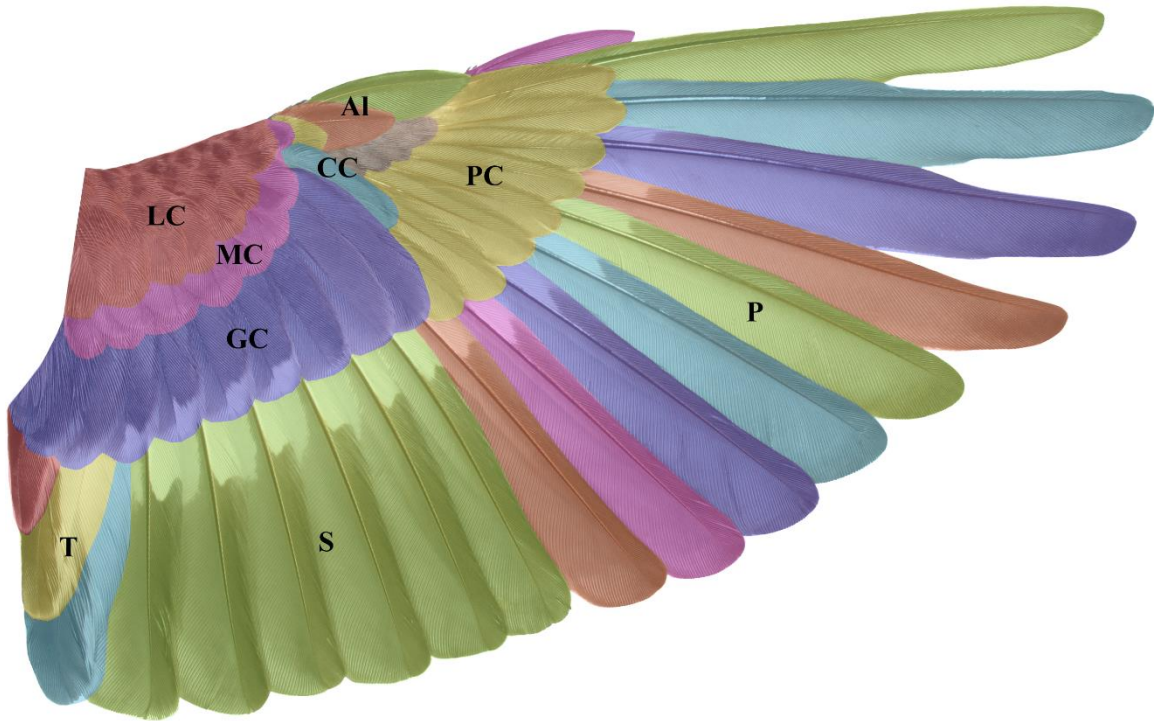

**B**

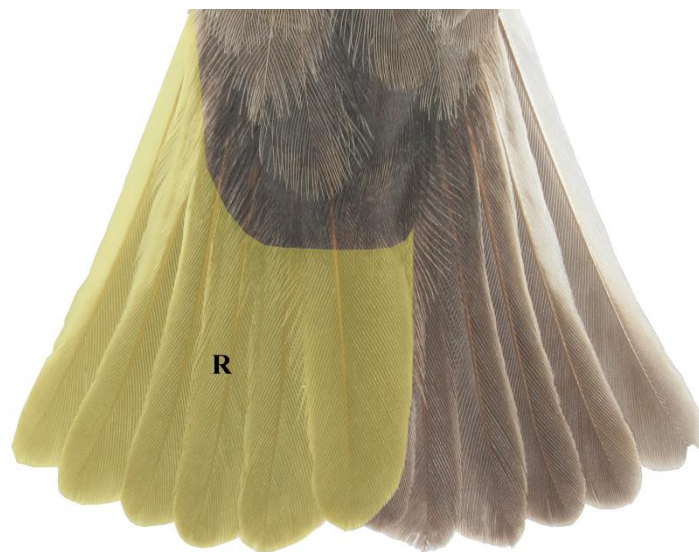

**Supplementary Figure 2.** Wing and tail feather tracts that were tested in this study and their abbreviations: **(A)** Illustration of the wing and **(B)** Illustration of tail (both of *Ficedula albicollis*).

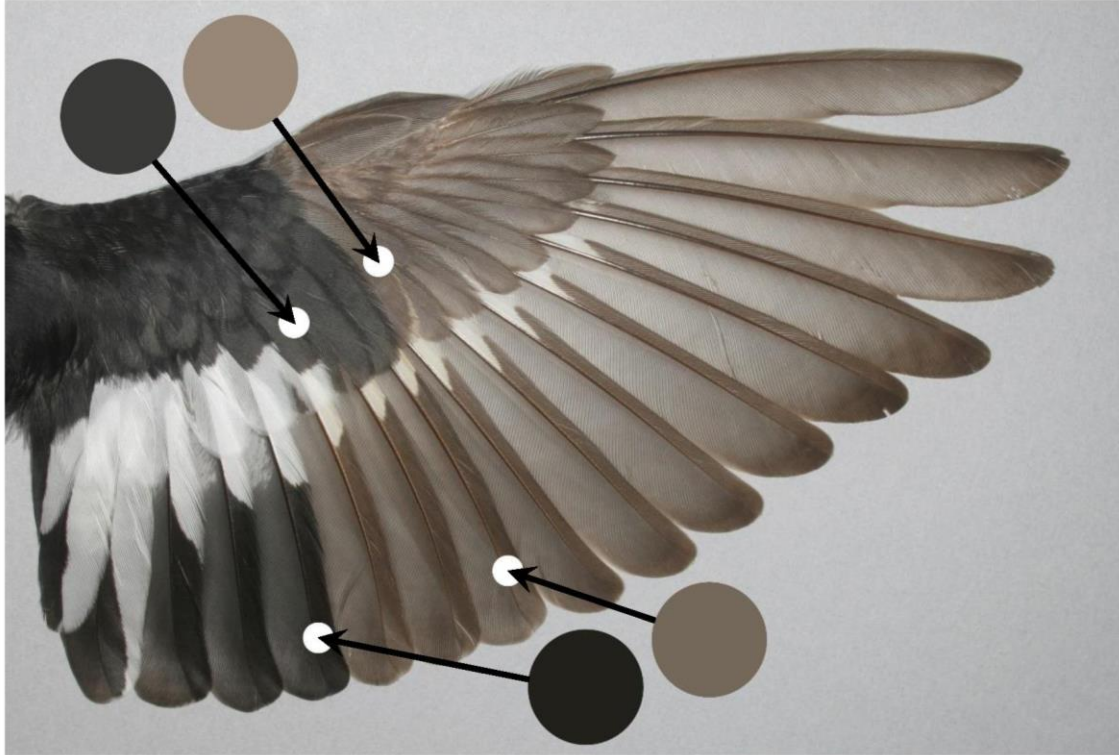

**Supplementary Figure 3.** Collared Flycatcher *Ficedula albicollis* male that was photographed after his post-juvenile moult (April 2016). The circles display the colour difference between moulted and non-moulted feathers in the greater-coverts and the secondaries, which were sampled using Photoshop version 6.0.1.a. The colour difference between moulted and non-moulted feathers is prominent.

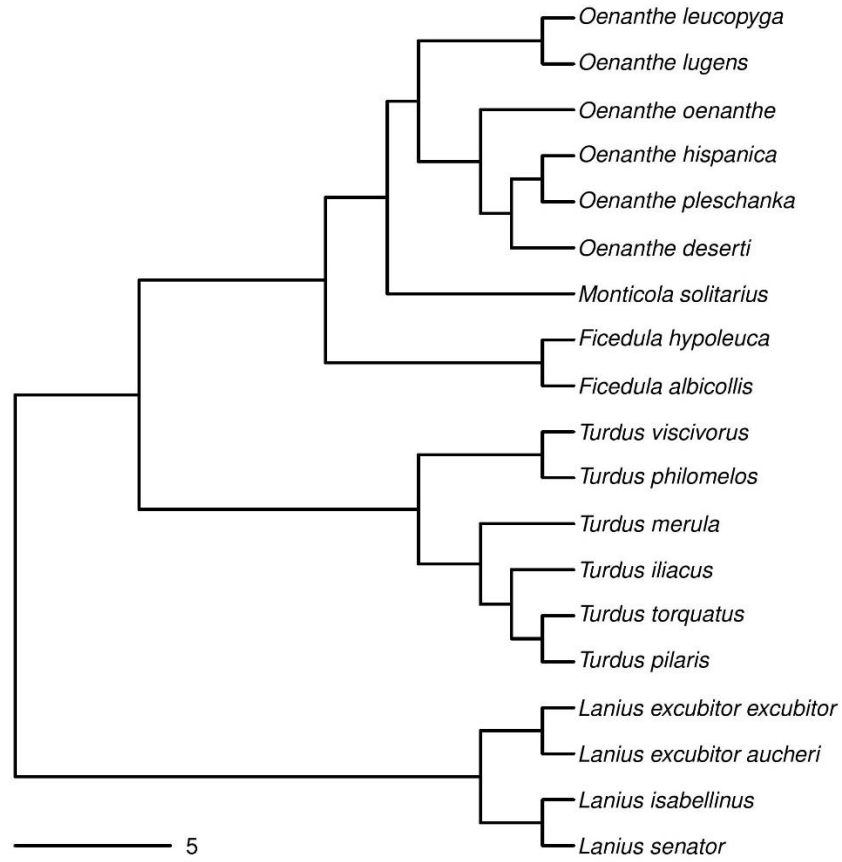

**Supplementary Figure 4.** The phylogenetic tree of the 19 examined species that was used in the Phylogenetic Generalized Least Square (PGLS) analysis (see Supplementary Table 5). The tree is based on an analysis of global bird diversity, using 10,000 trees obtained from BirdTree.org. The consensus tree was built using BEAST version 1.8.4. The scale (bottom left) represents 5 million years.

| Scientific name             | Common name            | Subspecies included                                                                                                                | Molt strategy  | Migration distance (km) | Sexual-dichromatism after the moult | Sample-size | Data period |
|-----------------------------|------------------------|------------------------------------------------------------------------------------------------------------------------------------|----------------|-------------------------|-------------------------------------|-------------|-------------|
| <i>Oenanthe oenanthe</i>    | Northern Wheatear      | <i>oenanthe</i> , <i>libanotica</i>                                                                                                | pre-migration  | 7200                    | No                                  | 224         | 1849-2016   |
| <i>Oenanthe deserti</i>     | Desert Wheatear        | <i>deserti</i> , <i>homochroa</i>                                                                                                  | pre-migration  | 1100                    | Yes                                 | 145         | 1834-2016   |
| <i>Oenanthe hispanica</i>   | Black-eared Wheatear   | <i>hispanica</i> , <i>melanoleuca</i>                                                                                              | pre-migration  | 2700                    | Yes                                 | 231         | 1812-2016   |
| <i>Oenanthe pleschanka</i>  | Pied Wheatear          | Monotypic                                                                                                                          | pre-migration  | 4400                    | Yes                                 | 195         | 1864-2016   |
| <i>Oenanthe lugens</i>      | Mourning Wheatear      | <i>lugens</i> , <i>persica</i>                                                                                                     | pre-migration  | 0                       | No                                  | 102         | 1822-2015   |
| <i>Oenanthe leucopyga</i>   | White-crowned Wheatear | <i>leucopyga</i> , <i>ernesti</i>                                                                                                  | pre-migration  | 0                       | No                                  | 101         | 1825-2016   |
| <i>Monticola solitarius</i> | Blue Rock-Thrush       | <i>solitarius</i> , <i>longirostris</i>                                                                                            | pre-migration  | 1300                    | Yes                                 | 107         | 1812-2015   |
| <i>Turdus philomelos</i>    | Song Thrush            | <i>philomelos</i> , <i>hebridensis</i> , <i>clarkei</i> , <i>nataliae</i>                                                          | pre-migration  | 2000                    | No                                  | 422         | 1855-2015   |
| <i>Turdus iliacus</i>       | Redwing                | <i>iliacus</i> , <i>coburni</i>                                                                                                    | pre-migration  | 2700                    | No                                  | 314         | 1805-2016   |
| <i>Turdus viscivorus</i>    | Mistle Thrush          | <i>viscivorus</i> , <i>deichleri</i>                                                                                               | pre-migration  | 1500                    | No                                  | 164         | 1846-2016   |
| <i>Turdus pilaris</i>       | Fieldfare              | Monotypic                                                                                                                          | pre-migration  | 1700                    | No                                  | 317         | 1805-2015   |
| <i>Turdus merula</i>        | Blackbird              | <i>merula</i> , <i>azorensis</i> , <i>cabrerae</i> , <i>mauritanicus</i> , <i>aterrimus</i> , <i>syriacus</i> , <i>intermedius</i> | pre-migration  | 300                     | Yes                                 | 491         | 1826-2016   |
| <i>Turdus torquatus</i>     | Ring Ouzel             | <i>torquatus</i> , <i>alpestris</i> , <i>amicorum</i>                                                                              | pre-migration  | 2500                    | Yes                                 | 239         | 1843-2016   |
| <i>Ficedula hypoleuca</i>   | Pied Flycatcher        | <i>hypoleuca</i> , <i>tomensis</i> , <i>iberiae</i> , <i>speculigera</i>                                                           | post-migration | 5200                    | Yes                                 | 182         | 1809-2015   |
| <i>Ficedula albicollis</i>  | Collared Flycatcher    | Monotypic                                                                                                                          | post-migration | 6900                    | Yes                                 | 112         | 1834-2016   |
| <i>Lanius isabellinus</i>   | Isabelline Shrike      | <i>isabellinus</i> , <i>phoenicuroides</i>                                                                                         | post-migration | 3400                    | Yes                                 | 105         | 1824-2016   |
| <i>Lanius senator</i>       | Woodchat Shrike        | <i>niloticus</i> , <i>senator</i> , <i>badius</i>                                                                                  | post-migration | 3400                    | Yes                                 | 184         | 1809-2015   |
| <i>Lanius e. excubitor</i>  | Great Grey Shrike      | <i>excubitor</i> , <i>homeyeri</i>                                                                                                 | pre-migration  | 900                     | No                                  | 228         | 1861-2016   |
| <i>Lanius e. aucheri</i>    | Southern Grey Shrike   | <i>aucheri</i> , <i>elegans</i> , <i>algeriensis</i>                                                                               | pre-migration  | 0                       | No                                  | 149         | 1821-2016   |

**Supplementary Table 1.** List of the study species including information on their moult strategy, migration distance, sexual-dichromatism, sample-size and data period (years).

| Scientific name             | Data source                        |                                                      |                                                          |                                         |                                                      |                                                |                                                 |                                                                                                    |                                               |                                     |       |
|-----------------------------|------------------------------------|------------------------------------------------------|----------------------------------------------------------|-----------------------------------------|------------------------------------------------------|------------------------------------------------|-------------------------------------------------|----------------------------------------------------------------------------------------------------|-----------------------------------------------|-------------------------------------|-------|
|                             | Natural History Museum (Tring; UK) | Museum National d'Histoire Naturelle (Paris, France) | National History Museum of Denmark (Copenhagen, Denmark) | Museum für Naturkunde (Berlin, Germany) | Museo Nacional de Ciencias Naturales (Madrid, Spain) | Naturhistoriska Riksmuseet (Stockholm, Sweden) | Natural History Museum Vienna (Vienna, Austria) | Steinhardt Museum of Natural History (TAC) and National Natural History Collections (HCJ) (Israel) | Naturhistorisches Museum (Basel, Switzerland) | Pictures obtained from the internet | Field |
| <i>Oenanthe oenanthe</i>    | 91                                 |                                                      | 50                                                       |                                         |                                                      | 35                                             | 17                                              | 24                                                                                                 |                                               | 1                                   | 6     |
| <i>Oenanthe deserti</i>     | 51                                 | 19                                                   | 17                                                       |                                         |                                                      | 9                                              | 21                                              | 7                                                                                                  |                                               | 10                                  | 11    |
| <i>Oenanthe hispanica</i>   | 128                                | 7                                                    |                                                          |                                         |                                                      |                                                | 57                                              | 16                                                                                                 |                                               | 11                                  | 12    |
| <i>Oenanthe pleschanka</i>  | 126                                |                                                      | 16                                                       | 12                                      |                                                      | 7                                              | 7                                               |                                                                                                    |                                               | 27                                  |       |
| <i>Oenanthe lugens</i>      | 40                                 | 8                                                    |                                                          | 7                                       |                                                      |                                                | 3                                               | 29                                                                                                 |                                               |                                     | 15    |
| <i>Oenanthe leucopyga</i>   | 67                                 |                                                      |                                                          |                                         |                                                      |                                                | 9                                               | 16                                                                                                 |                                               | 3                                   | 6     |
| <i>Monticola solitarius</i> | 47                                 | 11                                                   | 3                                                        | 4                                       | 5                                                    | 3                                              | 22                                              | 3                                                                                                  |                                               | 8                                   | 1     |
| <i>Turdus philomelos</i>    |                                    |                                                      | 115                                                      | 55                                      | 30                                                   | 75                                             | 30                                              | 22                                                                                                 | 29                                            |                                     | 66    |
| <i>Turdus iliacus</i>       |                                    | 31                                                   | 104                                                      | 29                                      | 3                                                    | 82                                             | 16                                              | 4                                                                                                  | 13                                            | 21                                  | 11    |
| <i>Turdus viscivorus</i>    | 42                                 | 11                                                   | 24                                                       | 13                                      | 10                                                   | 9                                              | 20                                              | 6                                                                                                  | 14                                            | 14                                  | 1     |
| <i>Turdus pilaris</i>       | 57                                 |                                                      | 99                                                       | 31                                      |                                                      | 42                                             | 37                                              | 11                                                                                                 | 21                                            | 13                                  | 6     |
| <i>Turdus merula</i>        |                                    |                                                      | 143                                                      | 43                                      | 15                                                   | 77                                             | 77                                              | 16                                                                                                 | 34                                            | 30                                  | 56    |
| <i>Turdus torquatus</i>     | 69                                 | 16                                                   | 64                                                       | 15                                      | 2                                                    | 8                                              | 23                                              | 1                                                                                                  | 5                                             | 5                                   | 31    |
| <i>Ficedula hypoleuca</i>   |                                    | 29                                                   |                                                          |                                         | 34                                                   | 65                                             | 26                                              | 2                                                                                                  |                                               |                                     | 26    |
| <i>Ficedula albicollis</i>  | 18                                 | 9                                                    | 4                                                        | 9                                       |                                                      | 28                                             | 11                                              | 4                                                                                                  |                                               | 12                                  | 17    |
| <i>Lanius isabellinus</i>   | 67                                 | 2                                                    | 7                                                        | 2                                       | 2                                                    | 5                                              | 2                                               | 3                                                                                                  |                                               | 7                                   | 8     |
| <i>Lanius senator</i>       | 42                                 | 12                                                   | 5                                                        | 6                                       | 37                                                   | 13                                             | 17                                              | 7                                                                                                  |                                               | 4                                   | 41    |
| <i>Lanius e. excubitor</i>  | 50                                 | 10                                                   | 60                                                       | 26                                      | 1                                                    | 22                                             | 57                                              |                                                                                                    |                                               | 2                                   |       |
| <i>Lanius e. aucheri</i>    | 37                                 | 16                                                   |                                                          | 12                                      | 4                                                    | 13                                             | 20                                              | 16                                                                                                 |                                               |                                     | 31    |

**Supplementary Table 2.** List of data sources for each study species.

|                             |                                | $r^2_{\text{model}}$ | df | logLik           | GMTA<br>Coefficient | Sex <sub>(male)</sub><br>Coefficient | GMTA : Sex <sub>(male)</sub><br>Coefficient | AICc    | ΔAICc  | Akaike<br>Weight |
|-----------------------------|--------------------------------|----------------------|----|------------------|---------------------|--------------------------------------|---------------------------------------------|---------|--------|------------------|
| <i>Oenanthe oenanthe</i>    | ~ GMTA                         | 0.05                 | 3  | -1429.80         | 89.52 ± 35.04       | NA                                   | NA                                          | 2865.60 | 0.00   | 0.88             |
|                             | Null Model                     | 0.00                 | 2  | -1432.86         | NA                  | NA                                   | NA                                          | 2869.70 | 4.10   | 0.12             |
| <i>Oenanthe deserti</i>     | ~ GMTA : Sex <sub>(male)</sub> | 0.20                 | 5  | -957.77          | 344.77 ± 87.24      | 121.02 ± 39.54                       | -228.81 ± 96.12                             | 1926.00 | 0.00   | 0.88             |
|                             | ~ GMTA + Sex <sub>(male)</sub> | 0.17                 | 4  | -960.83          | 164.85 ± 37.49      | 162.37 ± 34.46                       | NA                                          | 1930.00 | 4.00   | 0.12             |
|                             | ~ GMTA                         | 0.10                 | 3  | -970.95          | 172.71 ± 39.30      | NA                                   | NA                                          | 1948.10 | 22.10  | 0.00             |
|                             | Null Model                     | 0.00                 | 2  | -980.60          | NA                  | NA                                   | NA                                          | 1965.30 | 39.30  | 0.00             |
|                             | Averaged models (ΔAICc < 2)    |                      |    |                  | 344.77 ± 87.24      | 121.02 ± 39.54                       | -228.81 ± 96.12                             |         |        |                  |
| <i>Oenanthe hispanica</i>   | ~ GMTA + Sex <sub>(male)</sub> | 0.05                 | 4  | -1395.66         | 41.52 ± 17.47       | -32.59 ± 18.07                       | NA                                          | 2799.50 | 0.00   | 0.52             |
|                             | ~ GMTA                         | 0.03                 | 3  | -1397.32         | 46.03 ± 17.37       | NA                                   | NA                                          | 2800.70 | 1.20   | 0.28             |
|                             | ~ GMTA : Sex <sub>(male)</sub> | 0.05                 | 5  | -1395.66         | 42.07 ± 34.33       | -32.69 ± 18.89                       | -0.74 ± 39.90                               | 2801.60 | 2.10   | 0.18             |
|                             | Null Model                     | 0.00                 | 2  | -1400.84         | NA                  | NA                                   | NA                                          | 2805.70 | 6.20   | 0.02             |
| Averaged models (ΔAICc < 2) |                                |                      |    | 43.09 ± 17.56    | -32.59 ± 18.07      | NA                                   |                                             |         |        |                  |
| <i>Oenanthe pleschanka</i>  | ~ GMTA : Sex <sub>(male)</sub> | 0.09                 | 5  | -1274.88         | 152.32 ± 48.83      | 56.65 ± 28.28                        | -142.62 ± 58.25                             | 2560.10 | 0.00   | 0.86             |
|                             | ~ GMTA + Sex <sub>(male)</sub> | 0.05                 | 4  | -1277.83         | 58.27 ± 26.95       | 80.99 ± 26.29                        | NA                                          | 2563.90 | 3.80   | 0.13             |
|                             | ~ GMTA                         | 0.02                 | 3  | -1282.05         | 55.12 ± 27.52       | NA                                   | NA                                          | 2570.20 | 10.10  | 0.01             |
|                             | Null Model                     | 0.00                 | 2  | -1284.00         | NA                  | NA                                   | NA                                          | 2572.10 | 12.00  | 0.00             |
| Averaged models (ΔAICc < 2) |                                |                      |    | 152.32 ± 48.83   | 56.65 ± 28.28       | -142.62 ± 58.25                      |                                             |         |        |                  |
| <i>Oenanthe lugens</i>      | ~ GMTA                         | 0.08                 | 3  | -660.97          | 96.38 ± 34.80       | NA                                   | NA                                          | 1328.20 | 0.00   | 0.94             |
|                             | Null Model                     | 0.00                 | 2  | -664.85          | NA                  | NA                                   | NA                                          | 1333.80 | 5.60   | 0.06             |
| <i>Oenanthe leucopyga</i>   | ~ GMTA                         | 0.07                 | 3  | -709.12          | 156.53 ± 65.75      | NA                                   | NA                                          | 1424.50 | 0.00   | 0.87             |
|                             | Null Model                     | 0.00                 | 2  | -712.06          | NA                  | NA                                   | NA                                          | 1428.20 | 3.70   | 0.13             |
| <i>Monticola solitarius</i> | ~ GMTA : Sex <sub>(male)</sub> | 0.19                 | 5  | -740.83          | 304.63 ± 115.40     | 134.52 ± 63.67                       | -220.81 ± 143.35                            | 1492.30 | 0.00   | 0.56             |
|                             | ~ GMTA + Sex <sub>(male)</sub> | 0.17                 | 4  | -742.18          | 167.78 ± 69.14      | 190.61 ± 51.58                       | -                                           | 1492.70 | 0.40   | 0.44             |
|                             | ~ GMTA                         | 0.08                 | 3  | -749.26          | 202.29 ± 72.54      | -                                    | -                                           | 1504.80 | 12.50  | 0.00             |
|                             | Null Model                     | 0.00                 | 2  | -753.75          | NA                  | NA                                   | NA                                          | 1511.60 | 19.30  | 0.00             |
| Averaged models (ΔAICc < 2) |                                |                      |    | 244.49 ± 119.08  | 159.17 ± 64.93      | -220.81 ± 143.35                     |                                             |         |        |                  |
| <i>Turdus philomelos</i>    | ~ GMTA                         | 0.04                 | 3  | -2663.46         | 61.23 ± 14.31       | NA                                   | NA                                          | 5333.00 | 0.00   | 1.00             |
|                             | Null Model                     | 0.00                 | 2  | -2672.48         | NA                  | NA                                   | NA                                          | 5349.00 | 16.00  | 0.00             |
| <i>Turdus iliacus</i>       | ~ GMTA                         | 0.06                 | 3  | -1965.94         | 74.55 ± 17.21       | NA                                   | NA                                          | 3938.00 | 0.00   | 1.00             |
|                             | Null Model                     | 0.00                 | 2  | -1975.24         | NA                  | NA                                   | NA                                          | 3954.50 | 16.50  | 0.00             |
| <i>Turdus viscivorus</i>    | Null Model                     | 0.00                 | 2  | -1147.47         | NA                  | NA                                   | NA                                          | 2299.40 | 0.00   | 0.70             |
|                             | ~ GMTA                         | 0.00                 | 3  | -1147.66         | -28.62 ± 45.94      | NA                                   | NA                                          | 2301.10 | 1.70   | 0.30             |
| <i>Turdus pilaris</i>       | ~ GMTA                         | 0.07                 | 3  | -2096.34         | 128.84 ± 27.55      | NA                                   | NA                                          | 4198.70 | 0.00   | 1.00             |
|                             | Null Model                     | 0.00                 | 2  | -2106.98         | NA                  | NA                                   | NA                                          | 4218.00 | 19.30  | 0.00             |
| <i>Turdus merula</i>        | ~ GMTA : Sex <sub>(male)</sub> | 0.03                 | 5  | -4110.21         | 1979.00 ± 374.70    | -226.40 ± 191.90                     | -942.3 ± 448.40                             | 8230.50 | 0.00   | 1.00             |
|                             | ~ GMTA                         | 0.02                 | 3  | -4119.30         | 1458.29 ± 222.19    | NA                                   | NA                                          | 8244.60 | 14.10  | 0.00             |
|                             | ~ GMTA + Sex <sub>(male)</sub> | 0.02                 | 4  | -4119.20         | 1452.11 ± 222.17    | -43.84 ± 184.29                      | NA                                          | 8246.50 | 16.00  | 0.00             |
|                             | Null Model                     | 0.00                 | 2  | -4211.19         | NA                  | NA                                   | NA                                          | 8426.40 | 195.90 | 0.00             |
| Averaged models (ΔAICc < 2) |                                |                      |    | 1979.00 ± 374.70 | -226.40 ± 191.90    | -942.3 ± 448.40                      |                                             |         |        |                  |
| <i>Turdus torquatus</i>     | ~ GMTA : Sex <sub>(male)</sub> | 0.03                 | 5  | -1579.22         | 107.44 ± 39.81      | -9.65 ± 25.90                        | -137.96 ± 57.82                             | 3168.70 | 0.00   | 0.47             |
|                             | Null Model                     | 0.00                 | 2  | -1583.01         | NA                  | NA                                   | NA                                          | 3170.10 | 1.40   | 0.23             |
|                             | ~ GMTA                         | 0.01                 | 3  | -1582.17         | 38.63 ± 28.84       | NA                                   | NA                                          | 3170.40 | 1.70   | 0.20             |
|                             | ~ GMTA + Sex <sub>(male)</sub> | 0.01                 | 4  | -1581.82         | 43.23 ± 29.25       | 19.95 ± 23.07                        | NA                                          | 3171.80 | 3.10   | 0.10             |
|                             | Averaged models (ΔAICc < 2)    |                      |    |                  | 87.24 ± 48.43       | -9.65 ± 25.90                        | -137.96 ± 57.82                             |         |        |                  |
| <i>Ficedula hypoleuca</i>   | Null Model                     | 0.00                 | 2  | -1210.40         | NA                  | NA                                   | NA                                          | 2424.90 | 0.00   | 0.53             |
|                             | ~ GMTA                         | 0.00                 | 3  | -1210.23         | -17.77 ± 31.27      | NA                                   | NA                                          | 2426.60 | 1.70   | 0.22             |
|                             | ~ GMTA + Sex <sub>(male)</sub> | 0.01                 | 4  | -1209.62         | -15.99 ± 31.24      | -33.78 ± 32.08                       | NA                                          | 2427.50 | 2.60   | 0.14             |
|                             | ~ GMTA : Sex <sub>(male)</sub> | 0.01                 | 5  | -1208.86         | -76.08 ± 55.04      | -39.06 ± 32.48                       | 83.10 ± 66.84                               | 2428.10 | 3.20   | 0.11             |
|                             | Averaged models (ΔAICc < 2)    |                      |    |                  | -17.77 ± 31.27      | NA                                   | NA                                          |         |        |                  |
| <i>Ficedula albicollis</i>  | ~ GMTA : Sex <sub>(male)</sub> | 0.16                 | 5  | -843.05          | 572.29 ± 121.11     | 345.11 ± 95.88                       | -427.26 ± 145.98                            | 1696.70 | 0.00   | 0.91             |
|                             | ~ GMTA + Sex <sub>(male)</sub> | 0.12                 | 4  | -846.50          | 273.05 ± 69.58      | 341.37 ± 99.08                       | NA                                          | 1701.40 | 4.70   | 0.09             |
|                             | ~ GMTA                         | 0.10                 | 3  | -850.37          | 229.64 ± 71.87      | NA                                   | NA                                          | 1707.00 | 10.30  | 0.00             |
|                             | Null Model                     | 0.00                 | 2  | -854.60          | NA                  | NA                                   | NA                                          | 1713.30 | 16.60  | 0.00             |
| Averaged models (ΔAICc < 2) |                                |                      |    | 572.29 ± 121.11  | 345.11 ± 95.88      | -427.26 ± 145.98                     |                                             |         |        |                  |
| <i>Lanius isabellinus</i>   | ~ GMTA                         | 0.04                 | 3  | -874.14          | 450.00 ± 223.50     | NA                                   | NA                                          | 1754.50 | 0.00   | 0.56             |
|                             | ~ GMTA + Sex <sub>(male)</sub> | 0.04                 | 4  | -874.14          | 444.73 ± 230.24     | 20.96 ± 207.25                       | NA                                          | 1756.70 | 2.20   | 0.19             |
|                             | Null Model                     | 0.00                 | 2  | -876.28          | NA                  | NA                                   | NA                                          | 1756.70 | 2.20   | 0.19             |
|                             | ~ GMTA : Sex <sub>(male)</sub> | 0.04                 | 5  | -874.14          | 430.98 ± 381.24     | 25.14 ± 227.84                       | 21.54 ± 479.69                              | 1758.90 | 4.40   | 0.06             |
|                             | Averaged models (ΔAICc < 2)    |                      |    |                  | 450.00 ± 223.50     | NA                                   | NA                                          |         |        |                  |
| <i>Lanius senator</i>       | ~ GMTA : Sex <sub>(male)</sub> | 0.21                 | 5  | -1441.16         | 445.48 ± 156.49     | 175.87 ± 96.18                       | 309.60 ± 204.68                             | 2892.60 | 0.00   | 0.41             |
|                             | ~ GMTA + Sex <sub>(male)</sub> | 0.20                 | 4  | -1442.35         | 628.31 ± 101.25     | 164.59 ± 96.18                       | NA                                          | 2892.90 | 0.30   | 0.36             |
|                             | ~ GMTA                         | 0.18                 | 3  | -1443.84         | 628.38 ± 101.99     | NA                                   | NA                                          | 2893.80 | 1.20   | 0.23             |
|                             | Null Model                     | 0.00                 | 2  | -1462.13         | NA                  | NA                                   | NA                                          | 2928.30 | 35.70  | 0.00             |
| Averaged models (ΔAICc < 2) |                                |                      |    | 553.24 ± 155.65  | 170.60 ± 96.34      | -309.60 ± 204.68                     |                                             |         |        |                  |
| <i>Lanius e. excubitor</i>  | ~ GMTA                         | 0.02                 | 3  | -1590.24         | 118.21 ± 67.95      | NA                                   | NA                                          | 3186.60 | 0.00   | 0.81             |
|                             | Null Model                     | 0.00                 | 2  | -1592.73         | NA                  | NA                                   | NA                                          | 3189.50 | 2.90   | 0.19             |
| <i>Lanius e. aucheri</i>    | ~ GMTA                         | 0.11                 | 3  | -1314.40         | 960.20 ± 256.40     | NA                                   | NA                                          | 2635.00 | 0.00   | 0.99             |
|                             | Null Model                     | 0.00                 | 2  | -1320.15         | NA                  | NA                                   | NA                                          | 2644.40 | 9.40   | 0.01             |

**Supplementary Table 3.** The effect of GMTA: list of statistical models, statistics and Akaike Information Criterion (AICc).



|                             |                                      | $r^2_{\text{model}}$ | df | logLik   | Year<br>Coefficient | Sex <sub>(male)</sub><br>Coefficient | Year : Sex <sub>(male)</sub><br>Coefficient | AICc    | $\Delta$ AICc | Akaike<br>Weight |
|-----------------------------|--------------------------------------|----------------------|----|----------|---------------------|--------------------------------------|---------------------------------------------|---------|---------------|------------------|
| <i>Oenanthe oenanthe</i>    | ~ Year                               | 0.03                 | 3  | -1430.83 | 0.67 ± 0.31         | NA                                   | NA                                          | 2867.80 | 0.00          | 0.73             |
|                             | Null Model                           | 0.00                 | 2  | -1432.86 | NA                  | NA                                   | NA                                          | 2869.80 | 2.00          | 0.27             |
| <i>Oenanthe deserti</i>     | ~ Year : Sex <sub>(male)</sub>       | 0.21                 | 5  | -956.99  | 3.25 ± 0.88         | 3437.00 ± 1876.85                    | -1.69 ± 0.97                                | 1924.40 | 0.00          | 0.65             |
|                             | ~ Year + Sex <sub>(male)</sub>       | 0.19                 | 4  | -958.69  | 1.92 ± 0.38         | 167.42 ± 33.79                       | NA                                          | 1925.70 | 1.30          | 0.35             |
|                             | ~ Year                               | 0.12                 | 3  | -969.69  | 1.93 ± 0.40         | NA                                   | NA                                          | 1945.60 | 21.20         | 0.00             |
|                             | Null Model                           | 0.00                 | 2  | -980.60  | NA                  | NA                                   | NA                                          | 1965.30 | 40.90         | 0.00             |
|                             | Averaged models ( $\Delta$ AICc < 2) |                      |    |          | 2.78 ± 0.98         | 2293.62 ± 2173.06                    | -1.69 ± 0.97                                |         |               |                  |
| <i>Oenanthe hispanica</i>   | ~ Year + Sex <sub>(male)</sub>       | 0.04                 | 4  | -1396.23 | 0.37 ± 0.18         | -31.85 ± 18.22                       | NA                                          | 2800.60 | 0.00          | 0.49             |
|                             | ~ Year                               | 0.03                 | 3  | -1397.79 | 0.42 ± 0.17         | NA                                   | NA                                          | 2801.70 | 1.10          | 0.29             |
|                             | ~ Year : Sex <sub>(male)</sub>       | 0.04                 | 5  | -1396.16 | 0.47 ± 0.34         | 242.44 ± 770.55                      | -0.14 ± 0.40                                | 2802.60 | 2.00          | 0.18             |
|                             | Null Model                           | 0.00                 | 2  | -1400.84 | NA                  | NA                                   | NA                                          | 2805.70 | 5.10          | 0.04             |
|                             | Averaged models ( $\Delta$ AICc < 2) |                      |    |          | 0.41 ± 0.22         | 43.00 ± 420.95                       | -0.14 ± 0.40                                |         |               |                  |
| <i>Oenanthe pleschanka</i>  | ~ Year : Sex <sub>(male)</sub>       | 0.09                 | 5  | -1274.69 | 1.78 ± 0.56         | 3169.84 ± 1279.05                    | -1.61 ± 0.67                                | 2559.70 | 0.00          | 0.85             |
|                             | ~ Year + Sex <sub>(male)</sub>       | 0.06                 | 4  | -1277.57 | 0.71 ± 0.31         | 78.16 ± 26.26                        | NA                                          | 2563.30 | 3.60          | 0.14             |
|                             | ~ Year                               | 0.02                 | 3  | -1281.53 | 0.71 ± 0.31         | NA                                   | NA                                          | 2569.20 | 9.50          | 0.01             |
|                             | Null Model                           | 0.00                 | 2  | -1284.00 | NA                  | NA                                   | NA                                          | 2572.10 | 12.40         | 0.00             |
|                             | Averaged models ( $\Delta$ AICc < 2) |                      |    |          | 1.78 ± 0.56         | 3169.84 ± 1279.05                    | -1.61 ± 0.67                                |         |               |                  |
| <i>Oenanthe lugens</i>      | ~ Year                               | 0.08                 | 3  | -660.46  | 1.01 ± 0.33         | NA                                   | NA                                          | 1327.20 | 0.00          | 0.97             |
|                             | Null Model                           | 0.00                 | 2  | -664.85  | NA                  | NA                                   | NA                                          | 1333.80 | 6.60          | 0.03             |
| <i>Oenanthe leucopyga</i>   | ~ Year                               | 0.07                 | 3  | -709.49  | 1.38 ± 0.61         | NA                                   | NA                                          | 1425.20 | 0.00          | 0.82             |
|                             | Null Model                           | 0.00                 | 2  | -712.06  | NA                  | NA                                   | NA                                          | 1428.20 | 3.00          | 0.18             |
| <i>Monticola solitarius</i> | ~ Year : Sex <sub>(male)</sub>       | 0.19                 | 5  | -741.68  | 2.52 ± 1.01         | 3799.51 ± 2488.98                    | -1.88 ± 1.30                                | 1494.00 | 0.00          | 0.52             |
|                             | ~ Year + Sex <sub>(male)</sub>       | 0.17                 | 4  | -742.85  | 1.41 ± 0.64         | 199.84 ± 51.16                       | -                                           | 1494.10 | 0.10          | 0.48             |
|                             | ~ Year                               | 0.08                 | 3  | -750.59  | 1.59 ± 0.67         | -                                    | -                                           | 1507.40 | 13.40         | 0.00             |
|                             | Null Model                           | 0.00                 | 2  | -753.75  | NA                  | NA                                   | NA                                          | 1511.60 | 17.60         | 0.00             |
|                             | Averaged models ( $\Delta$ AICc < 2) |                      |    |          | 1.98 ± 1.01         | 2059.04 ± 2537.09                    | -1.88 ± 1.30                                |         |               |                  |
| <i>Turdus philomelos</i>    | ~ Year                               | 0.04                 | 3  | -2661.93 | 0.72 ± 0.15         | NA                                   | NA                                          | 5329.90 | 0.00          | 1.00             |
|                             | Null Model                           | 0.00                 | 2  | -2672.48 | NA                  | NA                                   | NA                                          | 5349.00 | 19.10         | 0.00             |
| <i>Turdus iliacus</i>       | ~ Year                               | 0.06                 | 3  | -1966.67 | 0.76 ± 0.18         | NA                                   | NA                                          | 3939.40 | 0.00          | 1.00             |
|                             | Null Model                           | 0.00                 | 2  | -1975.24 | NA                  | NA                                   | NA                                          | 3954.50 | 15.10         | 0.00             |
| <i>Turdus viscivorus</i>    | Null Model                           | 0.00                 | 2  | -1147.47 | NA                  | NA                                   | NA                                          | 2299.40 | 0.00          | 0.70             |
|                             | ~ Year                               | 0.00                 | 3  | -1147.35 | -0.40 ± 0.51        | NA                                   | NA                                          | 2300.80 | 1.40          | 0.30             |
| <i>Turdus pilaris</i>       | ~ Year                               | 0.10                 | 3  | -2091.32 | 1.54 ± 0.27         | NA                                   | NA                                          | 4188.70 | 0.00          | 1.00             |
|                             | Null Model                           | 0.00                 | 2  | -2106.98 | NA                  | NA                                   | NA                                          | 4218.00 | 29.30         | 0.00             |
| <i>Turdus merula</i>        | ~ Year : Sex <sub>(male)</sub>       | 0.03                 | 5  | -4130.51 | 20.52 ± 4.35        | 18112.71 ± 9890.12                   | -9.44 ± 5.13                                | 8271.10 | 0.00          | 1.00             |
|                             | ~ Year                               | 0.02                 | 3  | -4138.98 | 14.33 ± 2.43        | NA                                   | NA                                          | 8284.00 | 12.90         | 0.00             |
|                             | ~ Year + Sex <sub>(male)</sub>       | 0.02                 | 4  | -4138.59 | 14.11 ± 2.43        | -98.21 ± 212.31                      | NA                                          | 8285.30 | 14.20         | 0.00             |
|                             | Null Model                           | 0.00                 | 2  | -4211.19 | NA                  | NA                                   | NA                                          | 8426.40 | 155.30        | 0.00             |
|                             | Averaged models ( $\Delta$ AICc < 2) |                      |    |          | 20.52 ± 4.35        | 18112.71 ± 9890.12                   | -9.44 ± 5.13                                |         |               |                  |
| <i>Turdus torquatus</i>     | ~ Year : Sex <sub>(male)</sub>       | 0.03                 | 5  | -1579.54 | 1.01 ± 0.40         | 2668.93 ± 1168.75                    | -1.38 ± 0.61                                | 3169.30 | 0.00          | 0.40             |
|                             | Null Model                           | 0.00                 | 2  | -1583.01 | NA                  | NA                                   | NA                                          | 3170.10 | 0.80          | 0.28             |
|                             | ~ Year                               | 0.01                 | 3  | -1582.26 | 0.38 ± 0.30         | NA                                   | NA                                          | 3170.60 | 1.30          | 0.21             |
|                             | ~ Year + Sex <sub>(male)</sub>       | 0.01                 | 4  | -1581.93 | 0.42 ± 0.30         | 19.40 ± 23.08                        | NA                                          | 3172.00 | 2.70          | 0.11             |
|                             | Averaged models ( $\Delta$ AICc < 2) |                      |    |          | 0.80 ± 0.48         | 2668.93 ± 1168.75                    | -1.38 ± 0.61                                |         |               |                  |
| <i>Ficedula hypoleuca</i>   | Null Model                           | 0.00                 | 2  | -1210.40 | NA                  | NA                                   | NA                                          | 2424.90 | 0.00          | 0.58             |
|                             | ~ Year                               | 0.00                 | 3  | -1210.35 | -0.10 ± 0.33        | NA                                   | NA                                          | 2426.80 | 1.90          | 0.22             |
|                             | ~ Year + Sex <sub>(male)</sub>       | 0.01                 | 4  | -1209.73 | -0.09 ± 0.33        | -34.20 ± 32.09                       | NA                                          | 2427.70 | 2.80          | 0.14             |
|                             | ~ Year : Sex <sub>(male)</sub>       | 0.01                 | 5  | -1209.65 | -0.26 ± 0.55        | -544.08 ± 1350.08                    | 0.26 ± 0.69                                 | 2429.60 | 4.70          | 0.06             |
|                             | Averaged models ( $\Delta$ AICc < 2) |                      |    |          | -0.10 ± 0.33        | -34.20 ± 32.09                       | NA                                          |         |               |                  |
| <i>Ficedula albicollis</i>  | ~ Year : Sex <sub>(male)</sub>       | 0.15                 | 5  | -841.02  | 6.89 ± 1.16         | 10953.80 ± 2876.14                   | -5.50 ± 1.50                                | 1692.60 | 0.00          | 0.98             |
|                             | ~ Year + Sex <sub>(male)</sub>       | 0.09                 | 4  | -846.15  | 3.40 ± 0.79         | 332.24 ± 97.60                       | NA                                          | 1700.70 | 8.10          | 0.02             |
|                             | ~ Year                               | 0.09                 | 3  | -849.96  | 2.98 ± 0.83         | NA                                   | NA                                          | 1706.10 | 13.50         | 0.00             |
|                             | Null Model                           | 0.00                 | 2  | -854.60  | NA                  | NA                                   | NA                                          | 1713.30 | 20.70         | 0.00             |
|                             | Averaged models ( $\Delta$ AICc < 2) |                      |    |          | 6.89 ± 1.16         | 10953.80 ± 2876.14                   | -5.50 ± 1.50                                |         |               |                  |
| <i>Lanius isabellinus</i>   | ~ Year                               | 0.06                 | 3  | -872.87  | 5.84 ± 2.26         | NA                                   | NA                                          | 1752.00 | 0.00          | 0.65             |
|                             | ~ Year + Sex <sub>(male)</sub>       | 0.06                 | 4  | -872.87  | 5.86 ± 2.33         | -5.11 ± 205.09                       | NA                                          | 1754.10 | 2.10          | 0.22             |
|                             | ~ Year : Sex <sub>(male)</sub>       | 0.06                 | 5  | -872.86  | 6.14 ± 3.53         | 984.39 ± 9072.89                     | -0.51 ± 4.72                                | 1756.30 | 4.30          | 0.07             |
|                             | Null Model                           | 0.00                 | 2  | -876.28  | NA                  | NA                                   | NA                                          | 1756.70 | 4.70          | 0.06             |
|                             | Averaged models ( $\Delta$ AICc < 2) |                      |    |          | 5.84 ± 2.26         | NA                                   | NA                                          |         |               |                  |
| <i>Lanius senator</i>       | ~ Year + Sex <sub>(male)</sub>       | 0.18                 | 4  | -1443.81 | 6.40 ± 1.06         | 158.37 ± 96.92                       | NA                                          | 2895.80 | 0.00          | 0.44             |
|                             | ~ Year                               | 0.16                 | 3  | -1445.17 | 6.40 ± 1.07         | NA                                   | NA                                          | 2896.50 | 0.70          | 0.32             |
|                             | ~ Year : Sex <sub>(male)</sub>       | 0.18                 | 5  | -1443.34 | 4.98 ± 1.83         | -3968.01 ± 4367.40                   | 2.13 ± 2.25                                 | 2897.00 | 1.20          | 0.24             |
|                             | Null Model                           | 0.00                 | 2  | -1462.13 | NA                  | NA                                   | NA                                          | 2928.30 | 32.50         | 0.00             |
|                             | Averaged models ( $\Delta$ AICc < 2) |                      |    |          | 6.06 ± 1.43         | -1313.12 ± 3273.32                   | 2.13 ± 2.25                                 |         |               |                  |
| <i>Lanius e. excubitor</i>  | ~ Year                               | 0.02                 | 3  | -1589.89 | 1.34 ± 0.68         | NA                                   | NA                                          | 3185.90 | 0.00          | 0.86             |
|                             | Null Model                           | 0.00                 | 2  | -1592.73 | NA                  | NA                                   | NA                                          | 3189.50 | 3.60          | 0.14             |
| <i>Lanius e. aucheri</i>    | ~ Year                               | 0.11                 | 3  | -1315.12 | 9.44 ± 2.69         | NA                                   | NA                                          | 2636.40 | 0.00          | 0.98             |
|                             | Null Model                           | 0.00                 | 2  | -1320.15 | NA                  | NA                                   | NA                                          | 2644.40 | 8.00          | 0.02             |

**Supplementary Table 4.** The effect of year: list of statistical models, statistics and Akaike Information Criterion (AICc).

| Model (PGLS)                                | $\lambda$ | $r^2_{\text{model}}$ | df | logLik  | Migration distance :           |                            |                            | AICc   | $\Delta\text{AICc}$ | Akaike Weight |
|---------------------------------------------|-----------|----------------------|----|---------|--------------------------------|----------------------------|----------------------------|--------|---------------------|---------------|
|                                             |           |                      |    |         | Migration distance Coefficient | Moult strategy Coefficient | Moult strategy Coefficient |        |                     |               |
| <i>Null Model</i>                           | 0.03      | 0.00                 | 1  | -139.25 | NA                             | NA                         | NA                         | 280.70 | 0.00                | 0.39          |
| ~ Migration distance                        | 0.00      | 0.09                 | 2  | -138.36 | -0.05 ± 0.04                   | NA                         | NA                         | 281.50 | 0.80                | 0.27          |
| ~ Migration distance + Moult strategy       | 0.00      | 0.18                 | 3  | -137.36 | -0.09 ± 0.05                   | 325.51 ± 244.24            | NA                         | 282.30 | 1.60                | 0.18          |
| ~ Molt strategy                             | 0.00      | 0.01                 | 2  | -139.18 | NA                             | 80.57 ± 218.56             | NA                         | 283.10 | 2.40                | 0.12          |
| ~ Migration distance * Molt strategy        | 0.00      | 0.18                 | 4  | -137.33 | -0.08 ± 0.05                   | 448.65 ± 652.22            | -0.03 ± 0.14               | 285.50 | 4.80                | 0.04          |
| Averaged models ( $\Delta\text{AICc} < 2$ ) |           |                      |    |         | -0.07 ± 0.05                   | 325.51 ± 244.24            | NA                         |        |                     |               |

**Supplementary Table 5.** Results of analyses of the effects of migration distance (km) and moult strategy (pre- or post-migration moult) on the response of each species to Global Mean Temperature Anomalies (GMTA; slope).

| Mean area of moulted feathers (sample size) |                                   | <i>w</i> | <i>P</i> |
|---------------------------------------------|-----------------------------------|----------|----------|
| <i>Lanius (excubitor) excubitor</i>         | <i>Lanius (excubitor) aucheri</i> |          |          |
| 1073.85 mm <sup>2</sup> (228)               | 8636.55 mm <sup>2</sup> (149)     | 33968    | < 0.001  |

**Supplementary Table 6.** The separation of *Lanius excubitor* into two subspecies groups, *Lanius (excubitor) excubitor* (Great Grey Shrike) and *Lanius (excubitor) aucheri* (Southern Grey Shrike), is supported by a significant difference in their moult extent (Mann-Whitney U-test).

| Species                     | Feather tract area (mm <sup>2</sup> ) ± standard deviation (sample size) |                      |                       |                    |                    |                    |                    |                      |                     |                      |                     |                       |                      |                      |                      |                      |                     |                     |                     |                     |                     |                     |                       |                      |
|-----------------------------|--------------------------------------------------------------------------|----------------------|-----------------------|--------------------|--------------------|--------------------|--------------------|----------------------|---------------------|----------------------|---------------------|-----------------------|----------------------|----------------------|----------------------|----------------------|---------------------|---------------------|---------------------|---------------------|---------------------|---------------------|-----------------------|----------------------|
|                             | LC                                                                       | MC                   | GC                    | CC                 | AL1                | AL2                | AL3                | PC                   | T9                  | T8                   | T7                  | S                     | P1                   | P2                   | P3                   | P4                   | P5                  | P6                  | P7                  | P8                  | P9                  | P10                 | R                     |                      |
| <i>Oenanthe oenanthe</i>    | 346.2<br>± 24.5 (11)                                                     | 180.5<br>± 21.6 (11) | 867.5<br>± 83.3 (11)  |                    |                    |                    |                    |                      | 56.2<br>± 15.3 (11) | 133.7<br>± 19.8 (11) |                     |                       |                      |                      |                      |                      |                     |                     |                     |                     |                     |                     |                       |                      |
| <i>Oenanthe deserti</i>     | 356.9<br>± 40.5 (4)                                                      | 184.2<br>± 32.5 (4)  | 866.3<br>± 13.0 (4)   | 39.6<br>± 6.9 (4)  | 21.2<br>± 8.0 (4)  | 44.1<br>± 3.9 (4)  | 41.4<br>± 8.5 (4)  |                      | 55.0<br>± 15.8 (4)  | 115.3<br>± 22.6 (4)  | 125.7<br>± 18.6 (4) |                       |                      |                      |                      |                      |                     |                     |                     |                     |                     |                     | 1162.1<br>± 142.7 (6) |                      |
| <i>Oenanthe hispanica</i>   | 303.0<br>± 36.1 (10)                                                     | 160.8<br>± 25.9 (10) | 658.3<br>± 93.9 (10)  | 32.3<br>± 6.4 (10) | 16.9<br>± 5.6 (10) | 41.9<br>± 6.1 (10) |                    |                      | 49.0<br>± 7.7 (10)  |                      |                     |                       |                      |                      |                      |                      |                     |                     |                     |                     |                     |                     |                       |                      |
| <i>Oenanthe pleschanka</i>  | 370.4<br>± 94.3 (3)                                                      | 182.9<br>± 27.3 (3)  | 841.5<br>± 158.1 (3)  | 40.3<br>± 5.4 (3)  | 17.7<br>± 5.6 (3)  |                    |                    |                      | 52.9<br>± 4.3 (3)   | 122.4<br>± 39.8 (3)  | 161.3<br>± 24.3 (3) |                       |                      |                      |                      |                      |                     |                     |                     |                     |                     |                     |                       |                      |
| <i>Oenanthe lugens</i>      | 311.1<br>± 39.4 (7)                                                      | 162.2<br>± 22.4 (7)  | 737.3<br>± 70.1 (7)   | 32.3<br>± 8.4 (7)  | 22.1<br>± 6.1 (7)  | 48.8<br>± 7.5 (7)  | 48.0<br>± 8.8 (7)  |                      | 66.2<br>± 15.8 (7)  | 112.3<br>± 23.1 (7)  | 128.0<br>± 32.8 (7) |                       |                      |                      |                      |                      |                     |                     |                     |                     |                     |                     | 1186.0<br>± 151.3 (6) |                      |
| <i>Oenanthe leucopyga</i>   | 374.5<br>± 70.0 (4)                                                      | 223.5<br>± 37.7 (4)  | 912.5<br>± 128.5 (4)  | 41.7<br>± 4.4 (4)  | 27.8<br>± 8.2 (4)  | 58.6<br>± 7.8 (4)  | 53.6<br>± 9.3 (4)  |                      | 80.2<br>± 20.0 (4)  | 140.3<br>± 17.2 (4)  | 169.6<br>± 54.7 (4) |                       |                      |                      |                      |                      |                     |                     |                     |                     |                     |                     | 1497.7<br>± 68.9 (4)  |                      |
| <i>Monticola solitarius</i> | 563.9<br>± 50.2 (5)                                                      | 345.9<br>± 71.3 (5)  | 1267.5<br>± 132.4 (5) | 86.7<br>± 22.0 (5) |                    |                    |                    |                      | 73.2<br>± 10.4 (5)  | 172.4<br>± 13.3 (5)  |                     |                       |                      |                      |                      |                      |                     |                     |                     |                     |                     |                     | 2503.0<br>± 490.3 (5) |                      |
| <i>Turdus philomelos</i>    | 495.5<br>± 67.6 (4)                                                      | 372.3<br>± 28.0 (4)  | 1180.1<br>± 146.0 (4) |                    |                    |                    |                    |                      | 82.8<br>± 20.8 (4)  | 217.1<br>± 43.3 (4)  |                     |                       |                      |                      |                      |                      |                     |                     |                     |                     |                     |                     |                       |                      |
| <i>Turdus iliacus</i>       | 552.9<br>± 125.3 (4)                                                     | 332.8<br>± 53.2 (4)  | 1159.4<br>± 126.4 (4) |                    |                    |                    |                    |                      |                     |                      |                     |                       |                      |                      |                      |                      |                     |                     |                     |                     |                     |                     |                       |                      |
| <i>Turdus viscivorus</i>    | 736.4<br>± 143.3 (4)                                                     | 489.2<br>± 67.9 (4)  | 1645.8<br>± 125.6 (4) | 60.6<br>± 18.4 (4) | 52.3<br>± 16.0 (4) |                    |                    |                      | 127.5<br>± 38.3 (4) |                      |                     |                       |                      |                      |                      |                      |                     |                     |                     |                     |                     |                     |                       |                      |
| <i>Turdus pilaris</i>       | 641.4<br>± 109.9 (4)                                                     | 402.8<br>± 35.9 (4)  | 1553.5<br>± 200.5 (4) |                    |                    |                    |                    |                      | 109.2<br>± 41.3 (4) | 316.2<br>± 83.5 (4)  |                     |                       |                      |                      |                      |                      |                     |                     |                     |                     |                     |                     |                       |                      |
| <i>Turdus merula</i>        | 681.3<br>± 87.2 (4)                                                      | 395.9<br>± 31.5 (4)  | 1359.4<br>± 71.9 (4)  | 46.4<br>± 13.6 (4) | 33.6<br>± 5.2 (4)  | 95.6<br>± 14.1 (4) | 88.9<br>± 23.5 (4) | 804.9<br>± 79.8 (4)  | 62.2<br>± 38.2 (4)  | 232.3<br>± 17.7 (4)  | 260.1<br>± 68.4 (4) | 2892.2<br>± 252.8 (4) | 410.5<br>± 36.2 (4)  | 544.7<br>± 32.4 (4)  | 535.0<br>± 46.8 (4)  | 624.9<br>± 63.4 (4)  | 705.2<br>± 22.5 (4) | 670.2<br>± 25.1 (4) | 619.9<br>± 69.9 (4) | 590.2<br>± 49.8 (4) | 416.3<br>± 39.4 (4) | 42.1<br>± 13.1 (4)  | 3583.2<br>± 395.6 (5) |                      |
| <i>Turdus torquatus</i>     | 742.7<br>± 170.1 (4)                                                     | 427.0<br>± 62.4 (4)  | 1521.3<br>± 115.4 (4) |                    |                    |                    |                    |                      |                     |                      |                     |                       |                      |                      |                      |                      |                     |                     |                     |                     |                     |                     |                       |                      |
| <i>Ficedula hypoleuca</i>   | 201.8<br>± 22.3 (5)                                                      | 95.2<br>± 14.2 (5)   | 473.0<br>± 27.8 (5)   | 20.1<br>± 3.1 (5)  | 12.3<br>± 0.9 (5)  |                    |                    |                      | 35.7<br>± 9.7 (5)   | 82.6<br>± 10.0 (5)   | 109.9<br>± 13.7 (5) | 1019.8<br>± 56.2 (5)  |                      |                      |                      |                      |                     |                     |                     |                     |                     |                     | 893.8<br>± 116.0 (5)  |                      |
| <i>Ficedula albicollis</i>  | 215.5<br>± 17.1 (10)                                                     | 111.2<br>± 10.7 (10) | 457.4<br>± 37.4 (10)  | 26.0<br>± 4.0 (10) | 11.4<br>± 2.8 (10) | 29.1<br>± 6.5 (10) | 41.8<br>± 6.3 (10) | 314.4<br>± 21.7 (10) | 34.8<br>± 7.3 (10)  | 81.9<br>± 6.9 (10)   | 105.2<br>± 9.5 (10) | 993.1<br>± 84.8 (10)  | 182.1<br>± 16.5 (10) | 214.5<br>± 20.8 (10) | 215.1<br>± 18.1 (10) | 231.3<br>± 16.9 (10) |                     |                     |                     |                     |                     |                     | 26.3<br>± 9.2 (10)    | 864.6<br>± 127.2 (5) |
| <i>Lanius isabellinus</i>   | 382.1<br>± 79.2 (8)                                                      | 210.1<br>± 30.3 (8)  | 860.7<br>± 83.6 (8)   | 56.4<br>± 17.4 (8) | 17.6<br>± 2.6 (8)  | 41.0<br>± 4.8 (8)  | 57.7<br>± 16.5 (8) | 447.8<br>± 34.9 (8)  | 70.8<br>± 17.5 (8)  | 163.2<br>± 19.9 (8)  | 210.4<br>± 36.5 (8) | 1607.5<br>± 106.8 (8) | 275.6<br>± 44.8 (8)  | 315.6<br>± 21.2 (8)  | 311.0<br>± 11.8 (8)  | 349.2<br>± 19.7 (8)  | 371.8<br>± 27.3 (8) | 381.5<br>± 32.9 (8) | 406.9<br>± 45.1 (8) | 378.9<br>± 23.0 (8) | 273.7<br>± 29.8 (8) | 45.2<br>± 13.2 (8)  | 1813.3<br>± 171.9 (4) |                      |
| <i>Lanius senator</i>       | 380.2<br>± 84.1 (7)                                                      | 225.9<br>± 23.9 (7)  | 913.9<br>± 115.0 (7)  | 52.9<br>± 26.4 (7) | 13.7<br>± 4.2 (7)  | 49.0<br>± 9.8 (7)  | 67.6<br>± 16.3 (7) | 472.7<br>± 28.8 (7)  | 64.0<br>± 13.7 (7)  | 149.5<br>± 23.5 (7)  | 174.7<br>± 21.5 (7) | 1453.2<br>± 185.2 (7) | 247.5<br>± 50.1 (7)  | 308.7<br>± 26.7 (7)  | 305.9<br>± 46.7 (7)  | 344.2<br>± 29.3 (7)  | 350.9<br>± 42.1 (7) | 391.3<br>± 38.3 (7) | 432.1<br>± 25.6 (7) | 428.1<br>± 24.9 (7) | 338.1<br>± 16.2 (7) | 43.9<br>± 10.6 (7)  | 1876.1<br>± 276.3 (5) |                      |
| <i>Lanius excubitor</i>     | 477.1<br>± 61.7 (6)                                                      | 316.3<br>± 60.6 (6)  | 1170.5<br>± 119.6 (6) | 80.2<br>± 18.3 (6) | 26.3<br>± 7.9 (6)  | 70.1<br>± 7.8 (6)  | 65.9<br>± 12.3 (6) | 672.0<br>± 117.0 (6) | 94.8<br>± 18.2 (6)  | 209.0<br>± 30.8 (6)  | 198.6<br>± 56.4 (6) | 1895.0<br>± 142.5 (6) | 450.4<br>± 77.4 (6)  | 452.3<br>± 89.5 (6)  | 428.5<br>± 68.3 (6)  | 433.5<br>± 71.9 (6)  | 515.7<br>± 32.9 (6) | 539.7<br>± 35.1 (6) | 592.0<br>± 57.0 (6) | 530.1<br>± 60.5 (6) | 401.8<br>± 19.4 (6) | 121.0<br>± 22.0 (6) | 3209.7<br>± 389.7 (5) |                      |

**Supplementary Table 7.** Feather area of moulted feathers in the study species.
